# Supplementary material
Source: HighWire-hosted journal article supplement (https://www.annfammed.org/highwire/filestream/13575/field_highwire_adjunct_files/0/Hwang_Supp_App.pdf)
Supplement: Hwang_Supp_App.pdf [file Hwang_Supp_App.pdf]

**Supplemental materials for:**

Hwang AS, Dontchos BN, Dyer K, Murray J, Searl Como J, Horn DM. Targeted inpatient screening mammogram program to reduce disparities in breast cancer screening rates. *Ann Fam Med.* 2021;19(1):83.

Andrew S. Hwang, MD, MPH<sup>1</sup>

Brian N. Dontchos, MD<sup>2</sup>

Karen Dyer, RT (R)(M), CIIP<sup>2</sup>

Jennifer Murray, RT (R)(M)<sup>2</sup>

Jennifer Searl Como, MS<sup>3</sup>

Daniel M. Horn, MD<sup>1</sup>

<sup>1</sup>Division of General Internal Medicine, Massachusetts General Hospital, Boston, Massachusetts

<sup>2</sup>Division of Breast Imaging, Massachusetts General Hospital, Boston, Massachusetts

<sup>3</sup>Division of Performance Analysis and Improvement, Massachusetts General Hospital, Boston, Massachusetts

| Supplemental Table: Patient characteristics based on inpatient screening mammogram eligibility and completion |                                  |                                |                                                      |                                                         |                 |
|---------------------------------------------------------------------------------------------------------------|----------------------------------|--------------------------------|------------------------------------------------------|---------------------------------------------------------|-----------------|
|                                                                                                               | Inappropriate candidate (N = 13) | Appropriate candidate (N = 21) | Appropriate candidate & Mammogram completed (N = 17) | Appropriate candidate & Mammogram not completed (N = 4) | Refused (N = 5) |
| <b>Mean age, years</b>                                                                                        | 62                               | 59                             | 59                                                   | 62                                                      | 63              |
| <b>Medicaid, N (%)</b>                                                                                        | 3 (23%)                          | 15 (71%)                       | 12 (71%)                                             | 3 (75%)                                                 | 2 (40%)         |
| <b>Non-white, N (%)</b>                                                                                       | 3 (23%)                          | 7 (33%)                        | 6 (35%)                                              | 1 (25%)                                                 | 0               |
| <b>Non-English speaking, N (%)</b>                                                                            | 1 (8%)                           | 2 (10%)                        | 2 (12%)                                              | 0                                                       | 0               |
| <b>Mean length of stay, days</b>                                                                              | 8.2                              | 7.0                            | 7.0                                                  | 7.0                                                     | 6.2             |

**Acknowledgments:** Authors would like to thank Massachusetts General Hospital Breast Imaging staff members Gaelle Choute, Deborah Pierre, Lissett Vidal, and Joy Williams for their help coordinating the inpatient screening mammograms. Authors do not have any financial disclosures to report. There was no funding received for this study

## REFERENCES

1. Bonafede MM, Miller JD, Pohlman SK, et al. Breast, Cervical, and Colorectal Cancer Screening: Patterns Among Women With Medicaid and Commercial Insurance. *Am J Prev Med.* 2019;57(3):394-402.
2. Zhao G, Okoro CA, Li J, Town M. Health Insurance Status and Clinical Cancer Screenings Among U.S. Adults. *Am J Prev Med.* 2018;54(1):e11-e19.
3. Sabatino SA, Thompson TD, Guy GP Jr, de Moor JS, Tangka FK. Mammography Use Among Medicare Beneficiaries After Elimination of Cost Sharing. *Med Care.* 2016;54(4):394-399.
4. Alexandraki I, Mooradian AD. Barriers related to mammography use for breast cancer screening among minority women. *J Natl Med Assoc.* 2010;102(3):206-218.
5. Gierisch JM, O'Neill SC, Rimer BK, DeFrank JT, Bowling JM, Skinner CS. Factors associated with annual-interval mammography for women in their 40s. *Cancer Epidemiol.* 2009;33(1):72-78.
